# Supplementary material
Source: PubMed Central journal article supplement (PMC218721)
Supplement: pnas_2133463100_2.pdf [file pnas_2133463100_2.pdf]

vGFP\_Montast -----MTSVAQEKGVIKPDMKMKLRMEGAVNGHKEVIEGDGKRPFDGTQMDLTVIEG--APLPFAYAILTVFDYGNRVFAKYPEDI-  
vGFP\_Monta\_3 -----MTSVAQEKGVIKPDMKMKLRMEGAVNGHKEVIEGDGKRPFDGTQMDLTVIEG--APLPFAYDILTTFVDYGNRVFAKYPEDI-  
vGFP\_Monta\_4 -----MSVIKPDMKIKLRMEGAVNGHKEVIEGDGKRPFDGTQMDLTVIEG--APLPFAYDILTTFVDYGNRVFAKYPQDI-  
vGFP\_Montast -----MSVIKPDMKIKLRMEGAVNGHKEVIEGDGKRPFDGTQMDLTVIEG--APLPFAYDILTTFVDYGNRVFAKYPQDI-  
nGFP\_Montast -----MSMIKPEMKIKMRMDGAVNGHKEVITGEGSGPFFEGKQTMNLTVIDG--GLPFAFDILTTFADYGNRVFAKYPEDI-  
vGFP\_Montast -----MSVIKSVMKIKLRMDGIVNGHKEVITGEGSGPFFEGKQTMNLTVIEG--GLPFAFDILTTFADYGNRVFAKYPEDI-  
vGFP\_Monta\_8 -----MSVIKPIKIKLRMDGIVNGHKEVITGEGSGPFFEGKQTMNLTVIEG--APLPFAYDILTTFADYGNRVFAKYPEDI-  
vGFP\_cFP484\_ MKCKKFVFLSFLVLAITNANIFLRNEADLEKTLRIPKALTTMGVIKPDMKIKLRMEGAVNGHKEVIEGDGKRPFDGTQMDLTVIEG--APLPFAYDILTTFADYGNRVFAKYPEDI-  
dGFP\_Dendron -----MNLIKEDMRVVKVHMEGAVNGHKEVIEGDGKRPFDGTQMDLTVIEG--APLPFAYDILTTFADYGNRVFAKYPEDI-  
oGFP\_Ricorde -----MNAIQEEMKIKLTMGVVNGQSFQIDGEGKRPYEGSQKLTLEVVKG--GLPFFSYDILTTFADYGNRVFAKYPEDI-  
oGFP\_Rico\_12 -----MSALKEEMKIKLRMGVAVNGHKEVITGEGSGPFFEGKQTMNLTVIEG--GLPFFSYDILTTFADYGNRVFAKYPEDI-  
3GFP\_Discoso -----MSALKEEMKIKLRMGVAVNGHKEVITGEGSGPFFEGKQTMNLTVIEG--GLPFFSYDILTTFADYGNRVFAKYPEDI-  
oRFP\_Ricorde -----MSALKEEMKIKLTLVGVVNGHKEVITGEGSGPFFEGKQTMNLTVIEG--GLPFFSYDILTTFADYGNRVFAKYPEDI-  
bGFP2\_Scolym -----MQSAGKKNVVKDFMKITLRMDGAVNGHKEVAVNGTGDGNPFGIQLSLKLTVDGN--KLPFAFDILSAAFYGNRAFTYKPEI-  
bGFP1\_Scolym -----MQRAGMK--VKEHMKIKLRMGSTVNGHKEVAVNGTGDGNPFGIQLSLKLTVDGN--KLPFAFDILSAAFYGNRAFTYKPEI-  
2RFP\_FP593\_D -----MSCSKNVIKEFMRFKVRMEGTVNGHKEVIEGDGKRPYEGHCSVKLMVTGK--GLPFAFDILSPQFQYGSKVIVKHPADI-  
ed\_FP583\_Dis -----MRSSKNVIKEFMRFKVRMEGTVNGHKEVIEGDGKRPYEGHNTVKLKVTKG--GLPFAFDILSPQFQYGSKVIVKHPADI-  
nCP\_Goniopor -----MSVIAKQMTYKVMYSGTVNGHKEVIEGDGKRPYEGHNTVKLKVTKG--GLPFAFDILSPQFQYGSKVIVKHPADI-  
rGFP\_dsFP483 -----MSCSKSVIKEEMLIDDLHLEGTGNGHKEVIEGDGKRPYEGHNTVKLKVTKG--GLPFGWHILCPQFQYGNRAFHVHPDNI-  
rGFP\_Agarici -----VNGIAEEMKTDLIMEGIVNGHKEVITGEGSGPFFEGKQTMNLTVIEG--APLPFSDILTTFADYGNRVFAKYPEDI-  
aGFP\_Agarici -----MAISTLKNVIIIVIIYSCSTCAVWSNSNSSESSFTNGIAEEMKTRVHLEGTGNGHKEVITGEGSGPFFEGKQTMNLTVIEG--APLPFSDILTTFADYGNRVFAKYPEDI-  
gGFP\_Condyla -----MAGLLKESMRIKIYMEGTVNGYHKEVIEGDGKRPYEGHNTVKLKVTKG--APLPFAFDILSPCCAYGSKTFIKHTSGI-  
gCP\_Condylac -----MAGLLKESMRIKIYMEGTVNGYHKEVIEGDGKRPYEGHNTVKLKVTKG--APLPFAFDILSPCCAYGSKTFIKHTSGI-  
sCP\_Condylac -----MAGLLKESMRIKIYMEGTVNGYHKEVIEGDGKRPYEGHNTVKLKVTKG--APLPFAFDILSPCCAYGSKTFIKHTSGI-  
iCP\_Heteract -----MAGLLKESMRIKIYMEGTVNGHKEVIEGDGKRPYEGHNTVKLKVTKG--APLPFAFDILAPCCAYGSKTFIKHTSGI-  
lRNP\_Anemoni -----MASFLKKTMPFKTTIEGTGNGHKEVITGEGSGPFFEGKQTMNLTVIEG--APLPFAFDILSPCCAYGSKTFIKHTSGI-  
lCP\_Anemonia -----MASFLKKTMPFKTTIEGTGNGHKEVITGEGSGPFFEGKQTMNLTVIEG--APLPFAFDILSPCCAYGSKTFIKHTSGI-  
adrFP\_FP611 -----MNSLIKENMRMVMVMEGTVNGYHKEVITGEGSGPFFEGKQTMNLTVIEG--APLPFAFDILSPCCAYGSKTFIKHTSGI-  
gGFP\_Heterac -----MYSYIKETMRSKVYMEGTVNGHKEVITGEGSGPFFEGKQTMNLTVIEG--APLPFAFDILSHAFYGNRVFAKYPEDI-  
iGFP\_Heterac -----MCSYIKETMRSKVYMEGTVNGHKEVITGEGSGPFFEGKQTMNLTVIEG--APLPFAFDILSHAFYGNRVFAKYPEDI-  
gGFP\_Cond\_32 -----MYPWIKETMRSKVYMEGTVNGHKEVITGEGSGPFFEGKQTMNLTVIEG--APLPFAFDILSHAFYGNRVFAKYPEDI-  
lGFP\_Anemoni -----MYPWIKETMRVQLSMEGTVNGHKEVITGEGSGPFFEGKQTMNLTVIEG--APLPFAFDILSHAFYGNRVFAKYPEDI-  
eGFP\_Renilla -----MSKQILKNTCLQEVMSYKVNLEGIIVNHFVMEGCGKGNILFNQLVQIRVTKG--APLPFAFDIVSFAFYGNRVFAKYPEDI-  
lGFP\_Ptilosa -----MNRNVLKNTCLKEIMSAKASVEGIIVNHFVMEGCGKGNILFNQLVQIRVTKG--APLPFAFDIVSFAFYGNRVFAKYPEDI-  
GFP\_Renilla -----MDLAKLGLKEVMPKINLEGLVGDHAFSMEGVGENILEGTQEVKISVTKG--APLPFAFDIVSFAFYGNRVFAKYPEDI-  
nYFP\_zFP538 -----MAHSKHGLKEEMTKYHMEGTVNGHKEVITGEGSIYFFKQKQINLVCVIEG--GLPFFSEDILSAGFYGNRVFAKYPEDI-  
nGFP\_zFP506 -----MAQSKHGLTKEMTKYHMEGTVNGHKEVITGEGSIYFFKQKQINLVCVIEG--GLPFAEDILSAAFNIGNRVFAKYPEDI-  
n2RFP\_Zoanth -----MAHSKHGLTDDMTMHRMEGTVNGHKEVITGEGSIYFFKQKQINLVCVIEG--GLPFFSEDILSAAFNIGNRVFAKYPEDI-  
thGFP\_Zoanth -----MALSKHGLDFDMMTKYHMEGTVNGHKEVITGEGSIYFFKQKQINLVCVIEG--GLPFFSEDILSAAFNIGNRVFAKYPEDI-  
fp\_Meandrina -----MAVPTQVMMKYSMDGNFNGQSHTVVGGEGTNPYEGHQSLKLTVDGN--KLPFAFDILSATFYGNRVFAKYPEDI-  
jGFP\_amFP486 -----MALSNEFKIGDDMKMTYHMDGCVNGHKEVITGEGSGPFFEGKQTMNLTVIEG--APLPFAFDILSATFYGNRVFAKYPEDI-  
aGFP\_Aequore -----MSKGEELFTGVVPLVLELDGCVHGHKEVITGEGSGPFFEGKQTMNLTVIEG--KLPVFWPTLVTLGIGILCFARYPEHMK-  
cOFP\_Aequore -----MSKGEELFTGVVPLVLELDGCVHGHKEVITGEGSGPFFEGKQTMNLTVIEG--KLPVFWPTLVTLGIGILCFARYPEHMK-  
cGFP\_Aequore -----MSKGEELFTGIVPLVLELDGCVHGHKEVITGEGSGPFFEGKQTMNLTVIEG--KLPVFWPTLVTLGIGIQCFARYPEHMK-  
\_Aequorea\_vi -----MSKGEELFTGVVPLVLELDGCVHGHKEVITGEGSGPFFEGKQTMNLTVIEG--KLPVFWPTLVTLGIGIQCFARYPEHMK-  
sensus -----like-mkikl-meG-vngh-F-i-geG-G-pfeGtqsm-1-v-eg--apLpFaydilst-f-YGnr-f-kyp-di-

vGFP\_Monta\_3 83 -ADYFKQTFP---EGYFWERSMITYEDQGICVATNDITLMKGVGD---DCFVYKIRFDGYNFPANGPVMQKRTLKWEP---STEMYAR---DGVLRGDVNMALLLEG---GGHYRCDFKTTYKAKK---  
vGFP\_Monta\_4 76 -TDYFKQTFP---EGYFWERSMITYEDQGICVATNDITLMKGVGD---DCFVYKIRFDGYNFPANGPVMQKRTLKWEP---STEMYAR---DGVLRGDVNMALLLEG---GGHYRCDFKTTYKAKK---  
vGFP\_Montast 76 -PDYFKQTFP---EGYFWERSMITYEDQGICVATNDITLMKGVGD---DCFVYKIRFDGYNFPANGPVMQKRTLKWEP---STEMYAR---DGVLRGDVNMALLLEG---GGHYRCDFKTTYKAKK---  
nGFP\_Montast 76 -PDYFKQSFPP---EGYFWERSMITYEDGGICVATNDIKMEG---DCFSYKIRFDGYNFPANGPVMQKRTLKWEP---CTKEMYVR---DGVLRGDLNALLLEG---GGHFRCDLKTYYKAKK---  
vGFP\_Montast 76 -PDYFKQSFPP---EGYFWERSMITYEDQGICVATNDITLMKGVGD---DCFFYKIRFDGYNFPANGPVMQKRTLKWEP---STEMYAR---DGVLRGDVNMALLLEG---GGHYRCDFKTTYKAKK---  
vGFP\_Monta\_8 76 -PDYFKQTFP---EGYFWERSMITYEDQGICVATNDITLMKGVGD---DCFVYKIRFDGYNFPANGPVMQKRTLKWEP---STEMYAR---DGVLRGDVNMALLLEG---GGHYRCDFKTTYKAKK---  
vGFP\_cFP484\_ 118 -ADYFKQSFPP---EGYFWERSMITYEDKGIIVKVKSDISMEE---DSFYKIRFDGYNFPANGPVMQKRTLKWEP---STEMYAR---DGVLRGDVNMALLLEG---GGHYRCDFKTTYKAKK---  
dGFP\_Dendron 76 -TDYFKQSFPP---EGYFWERSMITYEDKGICTIRSDISLEG---DCFFYKIRFDGYNFPANGPVMQKRTLKWEP---STEMYAR---DGVLRGDVNMALLLEG---GGHYRCDFKTTYKAKK---  
oGFP\_Ricorde 76 -PDYFKQTCGGLDGGYSWQRMTIYEDGGVCTATSNVSVVG---DTFNYKIRFDGYNFPANGPVMQKRTLKWEP---SXEIXFER---DGLLRGDVNMALLLEG---GDHYRCDFKTTYKAKK---  
oGFP\_Rico\_12 76 -PDYFKQTCGSPDGGFSWQRMTIYEDGGVCTASNHISVDG---DTFYKIRFDGYNFPANGPVMQKRTLKWEP---STEMYAR---DGVLRGDVNMALLLEG---GGHYRCDFKTTYKAKK---  
oGFP\_Discosco 76 -PDYFKQTCGSPDGGFSWQRMTIYEDGGVCTATSNVSVVG---DTFNYKIRFDGYNFPANGPVMQKRTLKWEP---STEMYAR---DGVLRGDVNMALLLEG---GGHYRCDFKTTYKAKK---  
3RFP\_Ricorde 76 -PDYFKQTCGSPGAGYSWQRMTIYEDGGVCTATSNVSVVG---DTFNYKIRFDGYNFPANGPVMQKRTLKWEP---STEMYAR---DGVLRGDVNMALLLEG---GGHYRCDFKTTYKAKK---  
bGFP2\_Scolym 82 -SDYFKQSFEPFG---EGFTWERSMITYEDGAVCVATNDIKMVG---DEFQYKIRFDGYNFPANGPVMQKRTLKWEP---STEMYAR---DGVLRGDVNMALLLEG---GGHYRCDFKTTYKAKK---  
bGFP1\_Scolym 80 -ADYFKQSFEPFG---EGFTWERSMITYEDGAVCVATNDITMVG---GEFYKIRFDGYNFPANGPVMQKRTLKWEP---STEMYAR---DGVLRGDVNMALLLEG---GGHYRCDFKTTYKAKK---  
2RFP\_FP593\_D 80 -PDYFKLSFP---EGFKWERSMITYEDGGVTVTQDSSLDK---GCFYKIRFDGYNFPANGPVMQKRTLKWEP---STERLYPR---DGVLRGDIHALLLEG---GGHYLVEFKSIYMAKPP---  
ed\_FP583\_Dis 80 -PDYFKLSFP---EGFKWERSMITYEDGGVTVTQDSSLDK---GCFYKIRFDGYNFPANGPVMQKRTLKWEP---STERLYPR---DGVLRGDIHALLLEG---GGHYLVEFKSIYMAKPP---  
nCP\_Goniopor 76 -PDYFKQSFPP---EGYFWERSMITYEDGAVCVATNDISLQ---NCFIYNVKKFGLNFPANGPVMQKRTLKWEP---NTERLFAR---DGLLRGDVNMALLLEG---GGHYLVEFKSIYMAKPP---  
rGFP\_dsFP483 80 -HDYFKLSFP---EGYFWERSMITYEDGGVCTATSNVSVVG---NCFYKIRFDGYNFPANGPVMQKRTLKWEP---NTERLFAR---DGLLRGDVNMALLLEG---GGHYLVEFKSIYMAKPP---  
rGFP\_Agarici 87 -PDYFKQTFP---EGYHWRNIPFEDQAVCTVTSHIRLEEEER---RFVNNVRFHCVNFPANGPVMQKRTLKWEP---STEMYAR---DGVLRGDVNMALLLEG---GGHYRCDFKTTYKAKK---  
aGFP\_Agarici 109 -PDYFKQTFP---EGYHWRNIPFEDQAVCTVTSHIRLEEEER---RFVNNVRFHCVNFPANGPVMQKRTLKWEP---STEMYAR---DGVLRGDVNMALLLEG---GGHYRCDFKTTYKAKK---  
gGFP\_Condyla 77 -PDYFKRSFP---EGFTWERTIYEDGRLVTAHQDTSLEG---NCFIYKVKVLTGTFNFPANGPVMQKRTLKWEP---STEMYAR---DGVLRGDVNMALLLEG---GGHYRCDFKTTYKAKK---  
gCP\_Condylac 77 -PDYFKQSFPP---EGFTWERTIYEDGGVLTAAHQDTSLEG---NCLLYKVKVLTGTFNFPANGPVMQKRTLKWEP---CTEIVYQD---DGLLRGDVNMALLLEG---GGHYRCDFKTTYKAKK---  
sCP\_Condylac 77 -PDYFKQSFPP---EGFTWERTIYEDGGVLTAAHQDTSLEG---NCLLYKVKVLTGTFNFPANGPVMQKRTLKWEP---CTEIVYQD---DGLLRGDVNMALLLEG---GGHYRCDFKTTYKAKK---  
iCP\_Heteract 77 -PDYFKQSFPP---EGFTWERTIYEDGGVLTAAHQDTSLEG---NCLLYKVKVLTGTFNFPANGPVMQKRTLKWEP---CTEIVYQD---DGLLRGDVNMALLLEG---GGHYRCDFKTTYKAKK---  
lRNP\_Anemonia 77 -PDYFKQSFPP---EGFTWERTIYEDGGVLTAAHQDTSLEG---DCLVYKVKVLTGTFNFPANGPVMQKRTLKWEP---ATEIVYEV---DGLLRGDVNMALLLEG---GGHYRCDFKTTYKAKK---  
lCP\_Anemonia 77 -PDYFKQSFPP---EGFTWERTIYEDGGVLTAAHQDTSLEG---DCLVYKVKVLTGTFNFPANGPVMQKRTLKWEP---ATEIVYEV---DGLLRGDVNMALLLEG---GGHYRCDFKTTYKAKK---  
adrFP\_FP611\_ 77 -PDYFKQSFPP---EGFTWERTIYEDGGVLTAAHQDTSLEG---DCLVYKVKVLTGTFNFPANGPVMQKRTLKWEP---ATEIVYEV---DGLLRGDVNMALLLEG---GGHYRCDFKTTYKAKK---  
gGFP\_Heterac 77 -PDYFKQSLP---GGFTWERSMITYEDGGVLTAAHQDTSLEG---DCIICNKHVGTNFPANGPVMQKRTLKWEP---STETVIPR---DGLLRGDVNMALLLEG---GGHYRCDFKTTYKAKK---  
iGFP\_Heterac 77 -PDYFKQSLP---GGFTWERSMITYEDGGVLTAAHQDTSLEG---DCIICNKHVGTNFPANGPVMQKRTLKWEP---STETVIPR---DGLLRGDVNMALLLEG---GGHYRCDFKTTYKAKK---  
gGFP\_Cond\_32 77 -PDYFKQSLP---GGFTWERSMITYEDGGVLTAAHQDTSLEG---DCIICNKHVGTNFPANGPVMQKRTLKWEP---STETVIPR---DGLLRGDVNMALLLEG---GGHYRCDFKTTYKAKK---  
lGFP\_Anemoni 77 -PDYFKQSLP---GGFTWERSMITYEDGGVLTAAHQDTSLEG---DCIICNKHVGTNFPANGPVMQKRTLKWEP---STETVIPR---DGLLRGDVNMALLLEG---GGHYRCDFKTTYKAKK---  
eGFP\_Renilla 83 -SDYFIQSFPP---AGFYERNIRYEDGGVLTAAHQDTSLEG---DKFYKIRFDGYNFPANGPVMQKRTLKWEP---SFEAMYMN---DGLLRGDVNMALLLEG---GGHYRCDFKTTYKAKK---  
lGFP\_Ptilosa 83 -ADYFVQSFPP---AGFYERNIRYEDGGVLTAAHQDTSLEG---DKFYKIRFDGYNFPANGPVMQKRTLKWEP---SFEAMYMN---DGLLRGDVNMALLLEG---GGHYRCDFKTTYKAKK---  
gFP\_Renilla\_ 80 -SDYFLQSFPP---EGFTYERNIRYQDGGTAIVKSDISLED---GKFIYKIRFDGYNFPANGPVMQKRTLKWEP---SYESMYTN---DGLLRGDVNMALLLEG---GGHYRCDFKTTYKAKK---  
nYFP\_zFP538\_ 80 -VDYFKNSCF---AGYTWGRSFLFEDGAVCICNADITVSVKE---NCFYKIRFDGYNFPANGPVMQKRTLKWEP---SCEKIIPVFPKQ---DGLLRGDVNMALLLEG---GGHYRCDFKTTYKAKK---  
nGFP\_zFP506\_ 80 -VDYFKNSCF---AGYTWDRSFLFEDGAVCICNADITVSVKE---NCFYKIRFDGYNFPANGPVMQKRTLKWEP---SCEKIIPVFPKQ---DGLLRGDVNMALLLEG---GGHYRCDFKTTYKAKK---  
n2RFP\_Zoanth 80 -VDYFKNSCF---AGYTWDRSFLFEDGAVCICNADITVSVKE---NCFYKIRFDGYNFPANGPVMQKRTLKWEP---SCEKIIPVFPKQ---DGLLRGDVNMALLLEG---GGHYRCDFKTTYKAKK---  
thGFP\_Zoanth 80 -VDYFKNSCF---AGHTWQRSILFEDGAVCICNADITVSVKE---RCFYHESKFGVNFPPANGPVMQKRTLKWEP---SCEKIIPVFPNQG---DGLLRGDVNMALLLEG---GGHYRCDFKTTYKAKK---  
fp\_Meandrina 74 -TDYFKEAFP---GGLTWERSMITYEDGGVLTAAHQDTSLEG---SVFEHRSKFGVNFPPANGPVMQKRTLKWEP---STERMAAN---DGLLRGDVNMALLLEG---GGHYRCDFKTTYKAKK---  
jGFP\_amFP486 82 -PDYFKQAFP---DGMSYERTIYEDGGVLTAAHQDTSLEG---NCFEHSKFGVNFPPANGPVMQKRTLKWEP---SFEKMTVC---DGLLRGDVNMALLLEG---GGHYRCDFKTTYKAKK---  
aGFP\_Aequore 80 MNDFFKSAMP---EGYIQERTIFFQDDGKYKTRGEVKEFG---DTLVNRIELKGMDFKEDGNILGHKLEYNFNSHNVYIMPDKANNGLKVNFKIRHNEGGGVQLADHYQTNVPLGDG  
oGFP\_Aequore 80 MNDFFKSAMP---EGYIQERTIFFQDDGKYKTRGEVKEFG---DTLVNRIELKGMDFKEDGNILGHKLEYNFNSHNVYIMPDKANNGLKVNFKIRHNEGGGVQLADHYQTNVPLGDG  
cGFP\_Aequore 80 MNDFFKSAMP---EGYIQERTIFFQDDGKYKTRGEVKEFG---DTLVNRIELKGMDFKEDGNILGHKLEYNFNSHNVYIMPDKANNGLKVNFKIRHNEGGGVQLADHYQTNVPLGDG  
\_Aequorea\_vi 80 QHDFFKSAMP---EGYVQERTIFYKDDGNYKSRGEVKEFG---DTLVNRIELKGMDFKEDGNILGHKLEYNFNSHNVYIMPDKANNGLKVNFKIRHNEGGGVQLADHYQTNVPLGDG  
sensus 121 -pDyfkqsfp---egfswersl-yedggvct-tndisleg---dcfvkyrfdgynfp-angpvmqkrtlkwep-STEMYAR---DGVLRGDVNMALLLEG---GGHYRCDFKTTYKAKK---

Q8I6J8\_Kaede\_T 183 G--V~~K~~L~~F~~G~~Y~~H~~F~~V~~D~~H~~C~~I~~S~~I~~L~~R~~R~~H~~D~~K~~D~~-Y~~N~~E~~V~~K~~L~~Y~~E~~H~~A~~V~~A~~H~~S~~G~~L~~F~~D~~N~~V~~K-----BAC20344.1 [AB085641]  
 mcavRFP\_Montast 183 G--V~~K~~L~~F~~PD~~Y~~H~~F~~ED~~H~~S~~T~~E~~I~~L~~R~~R~~H~~D~~K~~S-Y~~T~~E~~V~~K~~L~~Y~~E~~H~~A~~E~~A~~H~~S~~G~~L~~P~~R~~V~~A~~K-----AAK71336 [AY037770]  
 mcavGFP\_Montast 192 V--V~~Q~~L~~F~~PD~~Y~~H~~F~~V~~D~~H~~R~~I~~E~~I~~V~~S~~H~~D~~K~~D-Y~~N~~E~~V~~K~~L~~Y~~E~~H~~A~~E~~A~~H~~S~~G~~L~~P~~R~~Q~~A~~K-----AAK71334 [AY03768]  
 mcavGFP\_Monta\_3 192 V--V~~R~~L~~F~~PD~~Y~~H~~F~~V~~D~~H~~R~~I~~E~~I~~V~~S~~H~~D~~K~~D-Y~~N~~E~~V~~K~~L~~Y~~E~~H~~A~~E~~A~~R~~H~~G~~L~~S~~R~~R~~A~~K-----AAK71335 [AY037769]  
 mcavGFP\_Monta\_4 185 V--V~~R~~L~~F~~PD~~Y~~H~~F~~V~~D~~H~~R~~I~~E~~I~~V~~S~~H~~D~~K~~D-Y~~N~~E~~V~~K~~L~~Y~~E~~H~~A~~E~~A~~X~~X~~G~~L~~S~~R~~R~~A~~K-----AAK97633 [AF406766]  
 mFavGFP\_Montast 185 F--V~~Q~~L~~F~~PD~~Y~~H~~F~~V~~D~~H~~R~~I~~E~~I~~L~~S~~H~~D~~K~~D-Y~~N~~E~~V~~K~~L~~Y~~E~~H~~A~~E~~A~~H~~S~~G~~L~~P~~R~~Q~~A~~K-----AAK83923 [AF01282]  
 manGFP\_Montast 182 V--V~~Q~~M~~P~~DD~~Y~~H~~F~~V~~N~~H~~R~~I~~E~~I~~T~~W~~H~~D~~E~~D-Y~~N~~N~~V~~K~~L~~S~~E~~H~~A~~E~~A~~H~~S~~G~~L~~P~~R~~Q~~A~~K-----AAK1332 [AY03776]  
 mcavGFP\_Montast 182 G--V~~V~~L~~F~~PE~~Y~~H~~F~~V~~D~~H~~R~~I~~E~~I~~L~~S~~H~~D~~K~~D-Y~~N~~T~~V~~E~~V~~Y~~E~~M~~A~~V~~A~~R~~F~~S~~M~~L~~F~~V~~R~~A~~K~~-----AAL17905 [AY056460]  
 mcavGFP\_Monta\_8 182 R--V~~Q~~L~~F~~PD~~Y~~H~~F~~V~~D~~H~~R~~I~~E~~I~~L~~S~~H~~D~~N~~D-Y~~N~~T~~V~~K~~L~~S~~E~~D~~A~~E~~A~~R~~Y~~S~~M~~L~~F~~S~~Q~~A~~K~~-----AAK62982 [AF384683]  
 clavGFP\_cFP484\_ 224 V--V~~K~~L~~F~~PD~~Y~~H~~F~~V~~D~~H~~R~~I~~E~~I~~L~~N~~H~~D~~K~~D-Y~~N~~E~~V~~T~~L~~Y~~E~~M~~A~~V~~A~~R~~Y~~S~~L~~I~~P~~S~~Q~~A-----AAF03374 [AF168424]  
 dendGFP\_Dendron 182 V--V~~Q~~L~~F~~PD~~Y~~H~~F~~V~~D~~H~~R~~I~~E~~I~~L~~S~~N~~D~~S~~D-Y~~N~~E~~V~~K~~L~~Y~~E~~H~~G~~V~~A~~R~~Y~~S~~P~~I~~P~~K~~S~~G~~L~~V~~E~~V~~Q~~C~~K~~A~~I~~N~~T~~A-----AAM10625 [AF420591]  
 rFloGFP\_Ricorde 185 K--V~~K~~L~~F~~G~~Y~~H~~F~~V~~D~~H~~C~~I~~E~~I~~K~~S~~Q~~E~~N~~D-Y~~N~~N~~V~~A~~L~~T~~E~~D~~A~~V~~A~~H~~Y~~S~~F~~L~~E~~K~~K~~S~~Q~~A~~K~~A-----AAK71340 [AY037774]  
 rFloGFP\_Rico\_12 185 K--V~~N~~M~~F~~G~~Y~~H~~F~~V~~D~~H~~C~~I~~E~~I~~Q~~K~~R~~D~~K~~D-Y~~N~~M~~A~~V~~L~~S~~E~~D~~A~~V~~A~~H~~N~~S~~F~~L~~E~~K~~K~~S~~Q~~A~~K~~A-----AAK71338 [AY037772]  
 dis3GFP\_Discosco 185 V--V~~K~~M~~P~~D~~Y~~H~~F~~V~~D~~H~~C~~I~~E~~I~~T~~S~~Q~~Q~~D~~Y-Y~~N~~V~~V~~E~~L~~T~~E~~V~~A~~E~~A~~R~~Y~~S~~S~~L~~E~~R~~I~~G~~K~~S~~K~~A-----AAM10627 [AF420593]  
 rFloRFP\_Ricorde 185 N--V~~K~~M~~P~~C~~Y~~H~~F~~V~~D~~H~~C~~I~~E~~I~~T~~S~~Q~~Q~~D~~D-Y~~N~~V~~V~~E~~L~~T~~E~~C~~A~~V~~A~~H~~Y~~S~~P~~L~~Q~~K~~D~~C~~Q~~A~~K~~A-----AAK71339 [AY037773]  
 scubGFP2\_Scolym 191 V~~F~~F~~T~~A~~L~~E~~X~~Y~~H~~Y~~V~~D~~H~~C~~I~~E~~I~~T~~E~~E~~N~~D-Y--V~~K~~L~~Q~~E~~T~~A~~K~~A~~R~~S~~G~~L~~H~~L~~E~~L~~Q~~K-----AAK71337 [AY037771]  
 scubGFP1\_Scolym 189 V~~F~~--H~~F~~F~~G~~Y~~H~~Y~~V~~D~~H~~C~~I~~E~~I~~L~~E~~E~~R~~K~~D~~-H--V~~K~~L~~R~~E~~H~~A~~K~~A~~R~~S~~L~~S~~E~~P~~T~~S~~A~~K~~E~~R~~K~~A-----AAK71333 [AY037767]  
 dis2RFP\_FP593\_D 187 S--V~~Q~~L~~F~~PG~~Y~~Y~~V~~D~~S~~K~~L~~D~~M~~T~~S~~H~~N~~E~~D~~-Y~~T~~V~~V~~E~~Q~~Y~~E~~K~~T~~Q~~G~~R~~H~~H~~P~~F~~I~~K~~P~~L~~Q~~-----AAG16224 [AF272711]  
 DeRed\_FP583\_Dis 187 ---V~~Q~~L~~F~~PG~~Y~~Y~~V~~D~~S~~K~~L~~D~~T~~T~~S~~H~~N~~E~~D~~-Y~~T~~V~~V~~E~~Q~~Y~~E~~R~~T~~E~~G~~R~~H~~H~~L~~F~~L~~-----AAF03369 [AF168419]  
 gtenCF\_Coniepor 183 ---V~~R~~M~~F~~G~~Y~~H~~Y~~V~~D~~R~~K~~L~~D~~V~~T~~N~~H~~N~~I~~D-Y~~T~~S~~V~~E~~Q~~C~~E~~I~~S~~I~~A~~R~~K~~P~~V~~V~~A~~-----AAL33912 [AF383156]  
 dsIRGFP\_dsRF483 187 A--V~~K~~N~~F~~G~~Y~~H~~Y~~V~~D~~I~~K~~L~~V~~I~~N~~N~~D~~K~~E~~-F~~M~~E~~V~~E~~S~~E~~L~~A~~V~~A~~K~~H~~H~~F~~F~~Y~~E~~F~~K~~K~~D~~K-----AAF03370 [AF168420]  
 agarGFP\_Agarici 199 IS--N~~F~~D~~F~~H~~T~~I~~D~~H~~R~~I~~M~~I~~T~~N~~H~~D~~E~~D-Y~~T~~N~~V~~E~~L~~R~~E~~V~~A~~L~~A~~R~~Y~~S~~T~~L~~E~~P~~I~~-----AAK71341 [AY037775]  
 aFraGFP\_Agarici 218 VR--D~~M~~P~~D~~F~~H~~T~~I~~D~~H~~R~~I~~E~~I~~T~~E~~H~~D~~E~~D~~-Y~~T~~N~~V~~E~~L~~H~~D~~V~~S~~W~~A~~R~~Y~~S~~M~~L~~P~~T~~M~~-----AAK71331 [AY037765]  
 cgigGFP\_Condyla 184 C-AL~~T~~M~~F~~PG~~F~~H~~F~~AD~~L~~R~~I~~Q~~M~~P~~K~~K~~K~~-K-DE~~F~~E~~L~~Y~~E~~A~~S~~V~~A~~R~~Y~~S~~D~~V~~P~~E~~K~~A~~T~~-----AAK71342 [AY037776]  
 cgigCF\_Condylac 184 C-AL~~T~~M~~F~~PG~~F~~H~~F~~AD~~L~~R~~I~~Q~~M~~P~~K~~K~~K~~-K-DE~~F~~E~~L~~Y~~E~~A~~S~~V~~A~~R~~Y~~S~~D~~V~~P~~E~~K~~A~~T~~-----AAL27537 [AF383775]  
 cpasCF\_Condylac 184 C-AL~~T~~M~~F~~PG~~F~~H~~F~~AD~~L~~R~~I~~Q~~M~~P~~K~~K~~K~~-S-DE~~F~~E~~L~~Y~~E~~A~~S~~V~~A~~R~~Y~~S~~D~~L~~I~~P~~E~~K~~A~~N-----AAL27541 [AF383155]  
 hcriCF\_Heteract 183 VRAL~~T~~M~~F~~PG~~F~~H~~F~~T~~D~~IR~~L~~Q~~M~~PR~~K~~K-K-DE~~F~~E~~L~~Y~~E~~A~~S~~V~~A~~R~~Y~~S~~D~~L~~I~~P~~E~~K~~A~~N-----AAL27538 [AF363776]  
 asulRNP\_Anenoni 184 ASAL~~K~~M~~F~~CG~~F~~H~~F~~CD~~H~~R~~I~~E~~I~~M~~E~~E~~V~~E~~K~~-G~~K~~C~~Y~~K~~Q~~Y~~E~~L~~A~~V~~A~~R~~Y~~C~~D~~A~~A~~P~~S~~K~~L~~C~~H~~H-----AAG41206 [AF322222]  
 asulCF\_Anenonia 184 ASAL~~K~~M~~F~~CG~~F~~H~~F~~ED~~H~~R~~I~~E~~I~~M~~E~~E~~V~~E~~K~~-G~~K~~C~~Y~~K~~Q~~Y~~E~~A~~A~~V~~G~~R~~Y~~C~~D~~A~~A~~P~~S~~K~~L~~G~~H~~N-----AAG02985 [AF246709]  
 equadrFP\_FP611\_ 184 VEN~~F~~K~~M~~PG~~F~~H~~F~~V~~D~~H~~R~~L~~E~~R~~L~~E~~S~~SDK-E~~H~~F~~V~~V~~Q~~H~~E~~H~~A~~V~~A~~K~~F~~CD~~L~~I~~P~~S~~K~~L~~G~~R~~L~~-----AAN05449.1 [AY130757]  
 hnaqGFP\_Heterac 185 V--N~~L~~E~~K~~L~~H~~F~~H~~H~~I~~R~~M~~E~~K~~D~~S~~I~~S~~D~~D~~-E~~K~~T~~I~~K~~H~~Q~~H~~D~~V~~R~~A~~S~~Y~~F~~N~~V~~R~~F~~D~~E~~S~~S-----AAD16871.1 [AY157666]  
 hcriGFP\_Heterac 185 G---E~~D~~A~~K~~P~~H~~F~~H~~H~~I~~R~~M~~E~~K~~D~~S~~V~~S~~D~~D~~-E~~K~~T~~I~~Q~~H~~E~~N~~V~~R~~A~~S~~Y~~F~~N~~D~~S~~G~~K-----AAM10626 [AF420592]  
 cgigGFP\_Cond\_32 185 V--K~~L~~F~~E~~L~~H~~F~~H~~H~~I~~R~~M~~E~~K~~L~~S~~V~~S~~D~~D~~-G~~K~~T~~I~~K~~H~~Q~~H~~E~~Y~~V~~V~~A~~S~~Y~~S~~K~~V~~F~~S~~K~~I~~G~~R~~Q-----AAK71343 [AY037771]  
 asulGFP\_Anenoni1 184 V--K~~L~~F~~E~~L~~H~~F~~H~~H~~I~~R~~M~~E~~K~~L~~N~~I~~S~~D~~D~~-W~~K~~T~~V~~E~~Q~~H~~E~~S~~V~~V~~A~~S~~Y~~S~~Q~~V~~P~~S~~K~~L~~G~~H~~N~~-----AAG41205 [AF322221]  
 rmueGFP\_Renilla 190 --V~~K~~E~~F~~F~~S~~Y~~H~~F~~I~~Q~~H~~R~~L~~E~~K~~T~~Y~~V~~E~~D~~G~~-G-F~~V~~E~~Q~~H~~E~~T~~A~~I~~A~~Q~~M~~T~~S~~I~~G~~K~~P~~L~~G~~S~~L~~H~~E~~W~~V~~-----AAG54098 [AY015996]  
 ptilGFP\_Ptilioea 190 --V~~K~~E~~F~~F~~E~~Y~~H~~F~~I~~H~~H~~R~~L~~E~~K~~T~~Y~~V~~E~~B~~C~~-S-F~~V~~E~~Q~~H~~E~~T~~A~~I~~A~~Q~~L~~T~~T~~I~~C~~K~~D~~L~~C~~S~~L~~H~~E~~W~~V~~-----AAG54097 [AY015995]  
 renGFP\_Renilla\_ 187 --V~~E~~T~~N~~E~~L~~Y~~H~~F~~I~~Q~~H~~R~~L~~V~~K~~I~~N~~V~~D~~T~~A~~-S~~G~~Y~~V~~V~~Q~~H~~E~~T~~A~~I~~A~~A~~N~~S~~T~~I~~N~~K~~I~~E~~G~~S~~L~~F-----AAK54757 [AF372525]  
 zoanYFP\_zFP538\_ 191 P--S~~K~~M~~P~~E~~W~~H~~F~~I~~Q~~H~~L~~L~~R~~E~~D~~R~~S~~D~~A~~K~~N~~Q~~E~~W~~Q~~L~~T~~E~~H~~A~~I~~A~~F~~P~~S~~A~~L~~A-----AAF03373 [AF168423]  
 zoanGFP\_zFP506\_ 191 P--R~~K~~M~~P~~D~~W~~H~~F~~I~~Q~~H~~L~~L~~T~~R~~E~~D~~R~~S~~D~~A~~K~~N~~Q~~E~~W~~H~~L~~T~~E~~H~~A~~I~~A~~S~~G~~S~~A~~L~~P~~-----AAF03372 [AF168422]  
 zoan2RFP\_Zoanth 191 P--K~~E~~M~~P~~D~~W~~H~~F~~I~~Q~~H~~L~~L~~N~~R~~E~~D~~R~~S~~D~~A~~K~~N~~Q~~E~~W~~Q~~L~~L~~E~~H~~A~~I~~A~~S~~R~~S~~A~~L~~P~~-----AAL23574 [AY059642]  
 zoathGFP\_Zoanth 191 P--K~~E~~M~~P~~D~~R~~H~~F~~I~~Q~~H~~L~~L~~T~~R~~E~~D~~R~~S~~D~~A~~K~~N~~Q~~E~~W~~Q~~L~~L~~E~~H~~A~~R~~A~~V~~A~~S~~L~~S~~A~~L~~P~~-----AAO49327 [AF482451.1]  
 mngip\_Meandrina 180 A--V~~K~~N~~F~~DN~~H~~F~~V~~W~~H~~R~~L~~V~~R~~---N~~G~~D~~G~~N~~T~~-V~~E~~L~~S~~T~~A~~E~~A~~R~~Y~~D~~S~~-----AAO07032.1 [AY155343]  
 anaJGFP\_anFP486 188 P--V~~T~~M~~F~~PN~~H~~V~~V~~E~~H~~R~~I~~A~~R~~T~~D~~I~~D~~K~~G~~G~~N~~S-V~~Q~~L~~T~~E~~H~~A~~V~~A~~H~~I~~T~~S~~V~~V~~P~~F-----AAF03371 [AF168421]  
 anaGFP\_Aequorea 192 P--V~~L~~T~~F~~IN~~H~~Y~~L~~S~~T~~Q~~T~~A~~I~~S~~K~~D~~R~~N~~E~~T~~R~~D~~H~~M~~V~~F~~L~~E~~F~~F~~S~~A~~C~~G~~H~~T~~H~~G~~M~~D~~E~~L~~Y~~K-----AAL33918 [AF435433]  
 anaCGFP\_Aequorea 192 P--V~~L~~T~~F~~IN~~H~~Y~~L~~S~~Y~~Q~~T~~A~~I~~S~~K~~D~~R~~N~~E~~T~~R~~D~~H~~M~~V~~F~~L~~E~~F~~F~~S~~A~~C~~G~~H~~T~~H~~G~~M~~D~~E~~L~~Y~~K-----AAL33917 [AF435432]  
 anaCGFP\_Aequorea 192 P--V~~L~~T~~F~~IN~~H~~Y~~L~~S~~I~~Q~~T~~A~~I~~S~~K~~D~~R~~N~~E~~T~~R~~D~~H~~M~~V~~F~~L~~E~~F~~F~~S~~A~~C~~G~~H~~T~~H~~G~~M~~D~~E~~L~~Y~~K-----AAL33912 [AF435427]  
 GFP\_Aequorea\_vi 192 P--V~~L~~L~~E~~DN~~H~~Y~~L~~S~~T~~Q~~S~~A~~L~~S~~K~~D~~P~~N~~E~~K~~R~~D~~H~~M~~L~~L~~E~~F~~V~~T~~A~~G~~I~~T~~H~~G~~M~~D~~E~~L~~Y~~K-----AAA27722 [M62654]  
 consensus 241 ---v-lp-yhfvdhriei-----d---v-l-e-ava--s-l-----
