# Supplementary material
Source: PubMed Central journal article supplement (PMC218721)

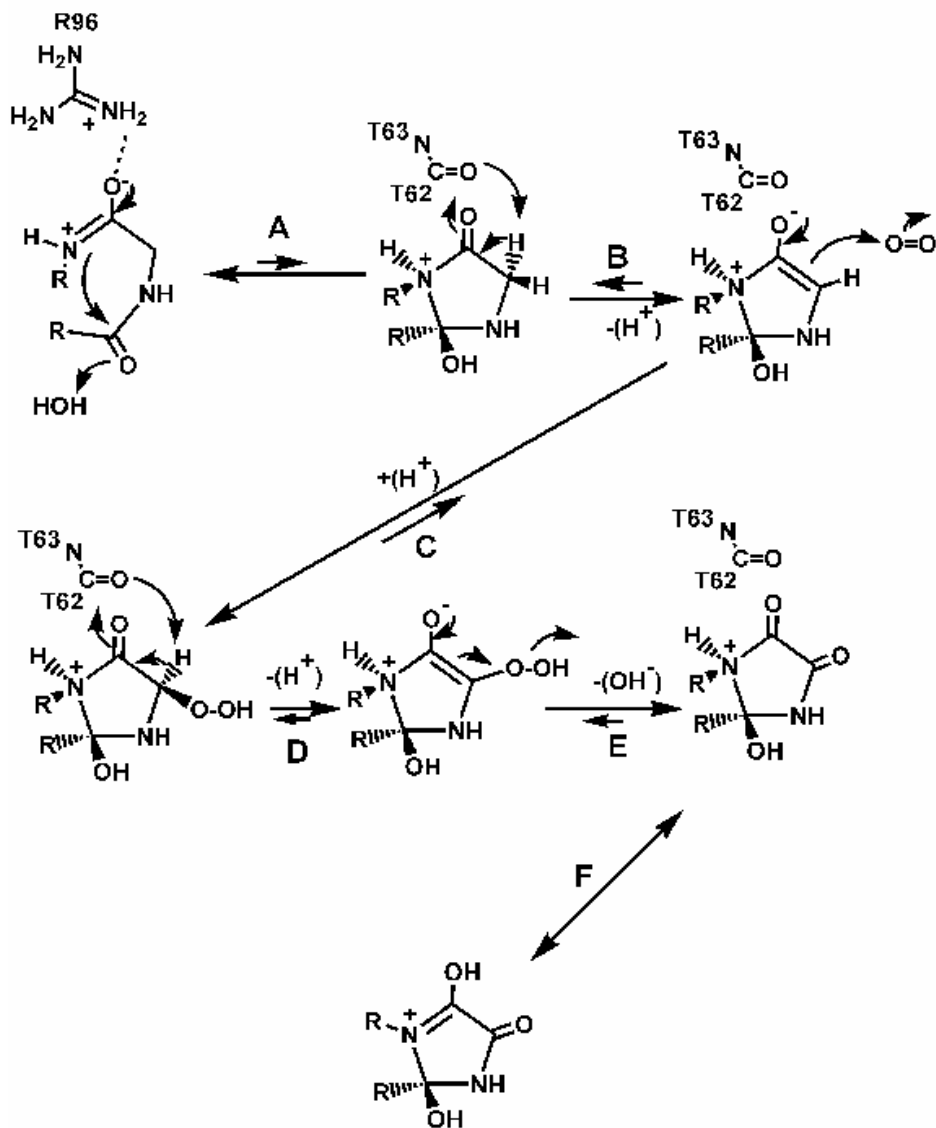

Supplement: pnas_2133463100_4.pdf [file pnas_2133463100_4.pdf]
